# Supplementary material
Source: MDPI journal article supplement (https://www.mdpi.com/2073-4441/13/17/2433)
Supplement: s1 [file s1]

Table S1: Group aggregated by consistency main criteria weights (non-normalized) for the participants derived from the AHP

|                          |               | Participant Grouping |            |          |          |            |          |             |
|--------------------------|---------------|----------------------|------------|----------|----------|------------|----------|-------------|
|                          |               | All                  | Governance | Advocacy | Research | N. America | Europe   | Australasia |
| Main criteria (weighted) | Political     | 1.308853             | 1.375575   | 1.556801 | 1.129504 | 1.319123   | 1.347352 | 1.251814    |
|                          | Economic      | 1.126391             | 1.428574   | 0.942493 | 0.980457 | 1.082772   | 1.52886  | 1.003971    |
|                          | Environmental | 0.896116             | 0.868602   | 0.644176 | 1.11293  | 0.882862   | 0.882117 | 0.946969    |
|                          | Social        | 0.75693              | 0.585858   | 1.057996 | 0.811364 | 0.793021   | 0.550332 | 0.84024     |

Table S2: Group aggregated by consistency sub-criteria weights (non-normalized) for the participants derived from the AHP

|               |                             | Participant Grouping |            |          |          |            |          |             |
|---------------|-----------------------------|----------------------|------------|----------|----------|------------|----------|-------------|
|               |                             | All                  | Governance | Advocacy | Research | N. America | Europe   | Australasia |
| Political     | Existing Leg.               | 1.050242             | 1.050483   | 1.009728 | 1.08424  | 1.123344   | 0.818002 | 1.168196    |
|               | Proj. Feas.                 | 1.379081             | 1.096756   | 1.881574 | 1.643667 | 1.225079   | 1.350252 | 2.305398    |
|               | Jurisdiction                | 1.049462             | 1.30648    | 0.954583 | 0.751507 | 1.148522   | 0.850967 | 1.000297    |
|               | Impl. Time                  | 0.657891             | 0.664352   | 0.551392 | 0.746669 | 0.63268    | 1.063942 | 0.371201    |
| Economic      | Public Costs                | 1.796779             | 2.022308   | 1.641036 | 1.715741 | 1.839982   | 1.670476 | 1.776326    |
|               | Priv. Costs                 | 0.891408             | 1.022024   | 0.801006 | 0.846279 | 0.764562   | 1.355881 | 0.994755    |
|               | Funding Av.                 | 1.331565             | 1.229846   | 1.616169 | 1.255016 | 1.271105   | 1.177614 | 1.637196    |
|               | G. Ind.Growth               | 0.468885             | 0.393406   | 0.470717 | 0.548764 | 0.559233   | 0.374917 | 0.345669    |
| Environmental | Storm. Cap.                 | 1.524715             | 1.752109   | 1.062154 | 1.608086 | 1.165836   | 2.466    | 2.188       |
|               | Strom. Qual.                | 1.111821             | 1.175901   | 1.332934 | 0.935917 | 1.272011   | 0.801905 | 1.02346     |
|               | Ecosys. Sup.                | 0.98715              | 0.868294   | 1.021298 | 1.122265 | 0.972465   | 1.139104 | 0.881299    |
|               | Energy Usage                | 0.597576             | 0.558986   | 0.691595 | 0.59205  | 0.693421   | 0.443936 | 0.506709    |
| Social        | Risk to HHS                 | 1.915801             | 1.729716   | 2.346846 | 1.894144 | 1.804662   | 1.229278 | 2.925593    |
|               | Civic Engag.                | 0.788778             | 0.703439   | 0.851981 | 0.875831 | 0.759048   | 1.041387 | 0.774546    |
|               | Red. Ineq.                  | 0.727661             | 0.774263   | 0.864679 | 0.581545 | 0.829138   | 0.554475 | 0.547323    |
|               | Synergies with other Adapt. | 0.909422             | 1.061477   | 0.578403 | 1.036533 | 0.880457   | 1.408822 | 0.806298    |

Table S3: Group aggregated TOPSIS distance from ideal positive ( $S^+$ ) and negative ( $S^-$ ) solution and closeness coefficient ( $C^*$ ) of the policy alternatives

|                         |             |       | Policy Alternatives    |                      |                       |                      |                           |
|-------------------------|-------------|-------|------------------------|----------------------|-----------------------|----------------------|---------------------------|
|                         |             |       | Grey Inf.<br>Overhauls | Public Green<br>Inf. | Private Green<br>Inf. | Govt<br>Streamlining | Maintaining<br>Urban Env. |
| Participant<br>Grouping | All         | $S^+$ | 0.230665               | 0.174632             | 0.199653              | 0.186028             | 0.19667                   |
|                         |             | $S^-$ | 0.184878               | 0.227296             | 0.204686              | 0.213305             | 0.196725                  |
|                         |             | $C^*$ | 0.444907               | 0.565514             | 0.506225              | 0.534154             | 0.500069                  |
|                         | Governance  | $S^+$ | 0.232896               | 0.177847             | 0.215516              | 0.198401             | 0.199202                  |
|                         |             | $S^-$ | 0.205854               | 0.233817             | 0.208471              | 0.230194             | 0.209241                  |
|                         |             | $C^*$ | 0.469183               | 0.567981             | 0.491692              | 0.53709              | 0.512289                  |
|                         | Advocacy    | $S^+$ | 0.225213               | 0.161315             | 0.181688              | 0.157504             | 0.185534                  |
|                         |             | $S^-$ | 0.145136               | 0.209841             | 0.185268              | 0.201355             | 0.179348                  |
|                         |             | $C^*$ | 0.39189                | 0.565371             | 0.504878              | 0.561098             | 0.491523                  |
|                         | Academia    | $S^+$ | 0.230639               | 0.172494             | 0.193365              | 0.18438              | 0.195094                  |
|                         |             | $S^-$ | 0.188253               | 0.232931             | 0.208036              | 0.204305             | 0.194995                  |
|                         |             | $C^*$ | 0.449407               | 0.574535             | 0.518275              | 0.525631             | 0.499874                  |
|                         | N. America  | $S^+$ | 0.219565               | 0.177902             | 0.203183              | 0.181526             | 0.193038                  |
|                         |             | $S^-$ | 0.195114               | 0.222475             | 0.19757               | 0.215649             | 0.197892                  |
|                         |             | $C^*$ | 0.470519               | 0.555664             | 0.492996              | 0.542957             | 0.506208                  |
|                         | Europe      | $S^+$ | 0.234297               | 0.182192             | 0.204206              | 0.186555             | 0.209358                  |
|                         |             | $S^-$ | 0.206722               | 0.215731             | 0.203547              | 0.216435             | 0.178808                  |
|                         |             | $C^*$ | 0.468738               | 0.542142             | 0.499192              | 0.537073             | 0.460648                  |
|                         | Australasia | $S^+$ | 0.255092               | 0.166696             | 0.183874              | 0.204727             | 0.202898                  |
|                         |             | $S^-$ | 0.14732                | 0.247325             | 0.227748              | 0.204469             | 0.206086                  |
|                         |             | $C^*$ | 0.366093               | 0.597373             | 0.553294              | 0.499685             | 0.503897                  |
